# Supplementary material for: The crystal structures, phase stabilities, electronic structures and bonding features of iridium borides from first-principles calculations
Source: Royal Society of Chemistry journal article supplement (doi:10.1039/d2ra01593e), 2022-01-01
Supplement: d2ra01593e1.pdf [file d2ra01593e1.pdf]

## Supplementary Material

### **The crystal structures, phase stabilities, electronic structures and bonding features of iridium borides from first-principles calculations**

Jinquan Zhang,<sup>a</sup> Yuanyuan Jin,<sup>\*a</sup> Chuanzhao Zhang,<sup>\*a</sup> Yanqi Wang,<sup>a</sup> Libiao Tang,<sup>a</sup> Song Li,<sup>a</sup> Meng Ju,<sup>b</sup> Jingjing Wang,<sup>c</sup> Weiguo Sun<sup>d</sup> and Xilong Dou<sup>e</sup>

<sup>a</sup> *Department of Physics and Optoelectronic Engineering, Yangtze University, Jingzhou 434023, China. Email: [scujyy@163.com](mailto:scujyy@163.com) (Yuanyuan Jin) and [zcz19870517@163.com](mailto:zcz19870517@163.com) (Chuanzhao Zhang)*

<sup>b</sup> *School of Physical Science and Technology, Southwest University, Chongqing 400715, China.*

<sup>c</sup> *College of Computer and Information Engineering, Hubei Normal University, Huangshi 435002, China.*

<sup>d</sup> *College of Physics and Electronic Information, Luoyang Normal University, Luoyang 471022, China*

<sup>e</sup> *Institute of Atomic and Molecular Physics, Sichuan University, Chengdu 610065, China*

**Table S1** Structural information for the lowest energy phases for each components considered in the Ir–B binary system under ambient pressure.

| Phase                          | Space group               | Lattice parameters (Å, °)                    | Atom   | Atomic coordinates (fractional) |         |         |
|--------------------------------|---------------------------|----------------------------------------------|--------|---------------------------------|---------|---------|
| Ir <sub>3</sub> B              | <i>P-6m2</i>              | $a=2.794, b=2.792, c=7.513, \gamma=120$      | Ir(1f) | 0.66667                         | 0.33333 | 0.50000 |
|                                |                           |                                              | Ir(2h) | 0.33333                         | 0.66667 | 0.19345 |
|                                |                           |                                              | B(1e)  | 0.66667                         | 0.33333 | 0.00000 |
| Ir <sub>2</sub> B              | <i>P2<sub>1</sub>/m</i>   | $a=5.699, b=2.803, c=4.736, \beta=80.720$    | Ir(2e) | 0.97286                         | 0.25000 | 0.76544 |
|                                |                           |                                              | Ir(2e) | 0.52023                         | 0.75000 | 0.23781 |
|                                |                           |                                              | B(2e)  | 0.75929                         | 0.25000 | 0.41058 |
| Ir <sub>3</sub> B <sub>2</sub> | <i>C2/m</i>               | $a=7.500, b=2.860, c=8.605, \beta=139.619$   | Ir(4i) | 0.33331                         | 0.00000 | 0.33495 |
|                                |                           |                                              | Ir(2a) | 0.00000                         | 0.00000 | 0.00000 |
|                                |                           |                                              | B(4i)  | 0.61554                         | 0.00000 | 0.27856 |
| Ir <sub>4</sub> B <sub>3</sub> | <i>Fmm2</i>               | $a=5.659, b=5.731, c=10.020$                 | Ir(8d) | 0.24894                         | 0.00000 | 0.33235 |
|                                |                           |                                              | Ir(8b) | 0.25000                         | 0.25000 | 0.07929 |
|                                |                           |                                              | B(8c)  | 0.00000                         | 0.25608 | 0.24163 |
| Ir <sub>5</sub> B <sub>4</sub> | <i>P6<sub>3</sub>/mmc</i> | $a=3.521, b=3.521, c=18.957, \gamma=120$     | B(4a)  | 0.00000                         | 0.00000 | 0.00000 |
|                                |                           |                                              | Ir(4f) | 0.33333                         | 0.66667 | 0.04790 |
|                                |                           |                                              | Ir(4e) | 0.00000                         | 0.00000 | 0.14924 |
|                                |                           |                                              | Ir(2c) | 0.33333                         | 0.66667 | 0.25000 |
|                                |                           |                                              | B(4f)  | 0.66667                         | 0.33333 | 0.07907 |
| IrB                            | <i>P2<sub>1</sub>/m</i>   | $a=6.722, b=3.924, c=3.556, \beta=98.705$    | B(4f)  | 0.66667                         | 0.33333 | 0.19462 |
|                                |                           |                                              | Ir(2e) | 0.13814                         | 0.25000 | 0.87934 |
|                                |                           |                                              | Ir(2e) | 0.63715                         | 0.25000 | 0.37912 |
|                                |                           |                                              | B(2e)  | 0.59694                         | 0.25000 | 0.69884 |
| Ir <sub>4</sub> B <sub>5</sub> | <i>Cm</i>                 | $a=10.623, b=2.902, c=12.373, \beta=149.737$ | B(2e)  | 0.09582                         | 0.25000 | 0.19876 |
|                                |                           |                                              | Ir(2a) | 0.74463                         | 0.00000 | 0.84784 |
|                                |                           |                                              | Ir(2a) | 0.00000                         | 0.00000 | 0.00000 |
|                                |                           |                                              | Ir(2a) | 0.54485                         | 0.00000 | 0.57077 |
|                                |                           |                                              | Ir(2a) | 0.28472                         | 0.00000 | 0.42031 |
|                                |                           |                                              | B(2a)  | 0.08389                         | 0.00000 | 0.32761 |
|                                |                           |                                              | B(2a)  | 0.82194                         | 0.00000 | 0.17625 |
|                                |                           |                                              | B(2a)  | 0.19934                         | 0.00000 | 0.09735 |
| Ir <sub>3</sub> B <sub>4</sub> | <i>Pnma</i>               | $a=16.266, b=2.962, c=6.028$                 | B(2a)  | 0.46237                         | 0.00000 | 0.25205 |
|                                |                           |                                              | B(2a)  | 0.38533                         | 0.00000 | 0.75904 |
|                                |                           |                                              | Ir(4c) | 0.01934                         | 0.25000 | 0.21009 |
|                                |                           |                                              | Ir(4c) | 0.18546                         | 0.25000 | 0.09055 |
|                                |                           |                                              | Ir(4c) | 0.35150                         | 0.25000 | 0.17166 |
|                                |                           |                                              | B(4c)  | 0.13486                         | 0.25000 | 0.42561 |
|                                |                           |                                              | B(4c)  | 0.40715                         | 0.25000 | 0.50234 |
| Ir <sub>2</sub> B <sub>3</sub> | <i>P6<sub>3</sub>/mmc</i> | $a=3.124, b=3.124, c=12.184,$                | B(4c)  | 0.21497                         | 0.75000 | 0.35015 |
|                                |                           |                                              | B(4c)  | 0.04250                         | 0.75000 | 0.46665 |
|                                |                           |                                              | Ir(4f) | 0.33333                         | 0.66667 | 0.13893 |

|                                |             |                                                |        |         |         |         |
|--------------------------------|-------------|------------------------------------------------|--------|---------|---------|---------|
|                                |             | $\gamma=120$                                   | B(4f)  | 0.33333 | 0.66667 | 0.96097 |
|                                |             |                                                | B(2d)  | 0.33333 | 0.66667 | 0.75000 |
| IrB <sub>2</sub>               | <i>C2/m</i> | $a=7.422, b=2.856, c=5.898,$<br>$\beta=67.353$ | Ir(4c) | 0.61236 | 0.25000 | 0.24258 |
|                                |             |                                                | B(4c)  | 0.39454 | 0.25000 | 0.50840 |
|                                |             |                                                | B(4c)  | 0.59708 | 0.25000 | 0.91963 |
| Ir <sub>2</sub> B <sub>5</sub> | <i>R3m</i>  | $a=2.976, b=2.976, c=24.747,$<br>$\gamma=120$  | Ir(3a) | 0.66667 | 0.33333 | 0.97776 |
|                                |             |                                                | Ir(3a) | 0.66667 | 0.33333 | 0.16843 |
|                                |             |                                                | B(3a)  | 0.66667 | 0.33333 | 0.07259 |
|                                |             |                                                | B(3a)  | 0.66667 | 0.33333 | 0.25611 |
|                                |             |                                                | B(3a)  | 0.33333 | 0.66667 | 0.04263 |
|                                |             |                                                | B(3a)  | 0.33333 | 0.66667 | 0.10614 |
|                                |             |                                                | B(3a)  | 0.33333 | 0.66667 | 0.22454 |
| IrB <sub>3</sub>               | <i>Pnma</i> | $a=9.825, b=3.145, c=4.546$                    | Ir(4c) | 0.10600 | 0.25000 | 0.35280 |
|                                |             |                                                | B(4c)  | 0.95110 | 0.25000 | 0.01260 |
|                                |             |                                                | B(4c)  | 0.32320 | 0.25000 | 0.19080 |
|                                |             |                                                | B(4c)  | 0.28850 | 0.25000 | 0.59090 |
|                                |             |                                                | B(4c)  | 0.28850 | 0.25000 | 0.59090 |

**Table S2** Calculated elastic compliance constants  $S_{ij}$  for the six considered structures in the Ir-B binary system.

| Phase       | Ir <sub>2</sub> B       | Ir <sub>3</sub> B <sub>2</sub> | Ir <sub>4</sub> B <sub>3</sub> | IrB                     | Ir <sub>4</sub> B <sub>5</sub> | Ir <sub>3</sub> B <sub>4</sub> |
|-------------|-------------------------|--------------------------------|--------------------------------|-------------------------|--------------------------------|--------------------------------|
| Space Group | <i>P2<sub>1</sub>/m</i> | <i>C2/m</i>                    | <i>Fmm2</i>                    | <i>P2<sub>1</sub>/m</i> | <i>Cm</i>                      | <i>Pnma</i>                    |
| $S_{11}$    | 0.002162                | 0.003216                       | 0.001999                       | 0.006793                | 0.002857                       | 0.001935                       |
| $S_{22}$    | 0.002425                | 0.002630                       | 0.002876                       | 0.005339                | 0.002955                       | 0.003126                       |
| $S_{33}$    | 0.004388                | 0.002964                       | 0.003104                       | 0.006640                | 0.002500                       | 0.002260                       |
| $S_{44}$    | 0.006651                | 0.005877                       | 0.011116                       | 0.016247                | 0.013626                       | 0.013343                       |
| $S_{55}$    | 0.041190                | 0.005598                       | 0.010718                       | 0.010759                | 0.006322                       | 0.006765                       |
| $S_{66}$    | 0.016536                | 0.007860                       | 0.008380                       | 0.021858                | 0.015798                       | 0.013192                       |
| $S_{12}$    | -0.000419               | -0.000888                      | -0.000425                      | -0.000873               | -0.000800                      | -0.000375                      |
| $S_{13}$    | -0.000510               | -0.001311                      | -0.000658                      | -0.004120               | -0.000929                      | -0.000405                      |
| $S_{23}$    | -0.001344               | -0.000542                      | -0.001251                      | -0.001426               | -0.000588                      | -0.001127                      |
| $S_{15}$    | 0.000373                | 0.000566                       |                                | -0.000749               | -0.000684                      |                                |
| $S_{25}$    | 0.002713                | -0.000456                      |                                | 0.002712                | 0.000839                       |                                |
| $S_{35}$    | -0.009182               | 0.000072                       |                                | 0.001521                | -0.000120                      |                                |
| $S_{46}$    | -0.003480               | -0.001001                      |                                | 0.014071                | 0.005929                       |                                |

**Table S3** The calculated ICOHP of solid  $\alpha$ -B,  $P2_1/m$ -Ir<sub>2</sub>B,  $C2/m$ -Ir<sub>3</sub>B<sub>2</sub>,  $Fmm2$ -Ir<sub>4</sub>B<sub>3</sub>,  $P2_1/m$ -IrB,  $Cm$ -Ir<sub>4</sub>B<sub>5</sub>, and  $Pnma$ -Ir<sub>3</sub>B<sub>4</sub>.

| Phase                          | Space group | Bond length (Å)         | ICOHP (eV) |
|--------------------------------|-------------|-------------------------|------------|
| B                              | $R\bar{3}m$ | B-B <sup>1</sup> =1.67  | -7.72      |
|                                |             | B-B <sup>2</sup> =1.80  | -4.62      |
|                                |             | B-B <sup>3</sup> =1.74  | -4.81      |
|                                |             | B-B <sup>4</sup> =2.00  | -3.47      |
| Ir <sub>2</sub> B              | $P2_1/m$    | Ir-B <sup>1</sup> =2.14 | -2.89      |
|                                |             | Ir-B <sup>2</sup> =2.20 | -2.55      |
| Ir <sub>3</sub> B <sub>2</sub> | $C2/m$      | Ir-B <sup>1</sup> =2.15 | -3.00      |
|                                |             | Ir-B <sup>2</sup> =2.19 | -2.86      |
| Ir <sub>4</sub> B <sub>3</sub> | $Fmm2$      | Ir-B=2.16               | -3.05      |
| IrB                            | $P2_1/m$    | Ir-B <sup>1</sup> =2.11 | -3.01      |
|                                |             | Ir-B <sup>2</sup> =2.17 | -3.10      |
| Ir <sub>4</sub> B <sub>5</sub> | $Cm$        | Ir-B <sup>1</sup> =2.16 | -2.98      |
|                                |             | Ir-B <sup>2</sup> =2.17 | -2.63      |
|                                |             | Ir-B <sup>3</sup> =2.13 | -2.58      |
|                                |             | B-B <sup>1</sup> =1.89  | -5.03      |
|                                |             | B-B <sup>2</sup> =2.00  | -3.93      |
|                                |             | B-B <sup>3</sup> =2.12  | -3.03      |
| Ir <sub>3</sub> B <sub>4</sub> | $Pnma$      | Ir-B <sup>1</sup> =2.17 | -2.50      |
|                                |             | Ir-B <sup>2</sup> =2.20 | -2.28      |
|                                |             | B-B <sup>1</sup> =2.02  | -3.97      |
|                                |             | B-B <sup>2</sup> =2.12  | -3.08      |
|                                |             | B-B <sup>3</sup> =2.06  | -3.62      |

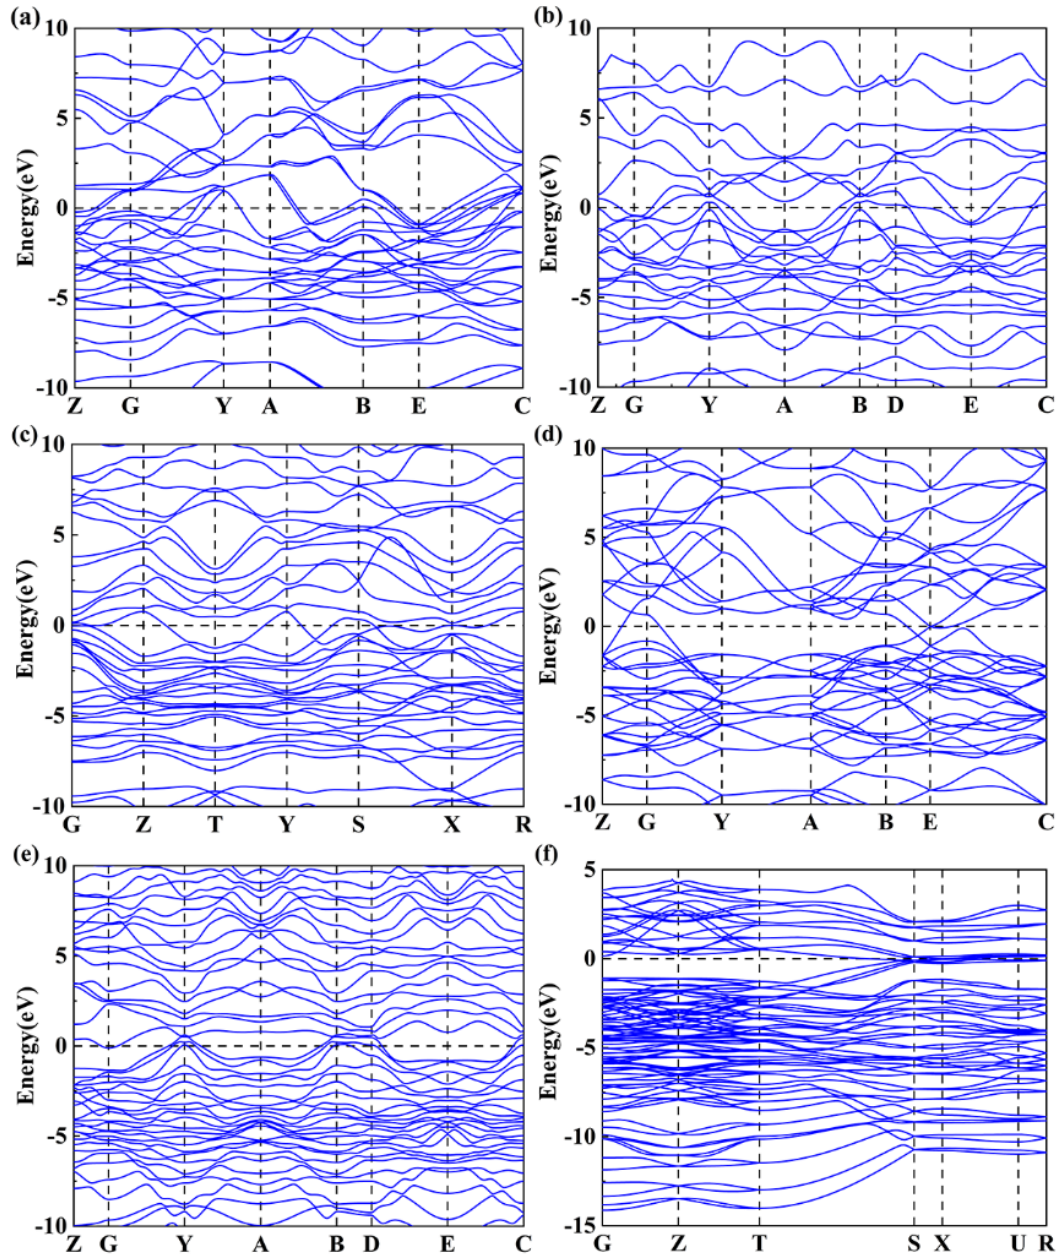

**Fig. S1** Calculated electronic band structures for (a)  $P2_1/m$ - $\text{Ir}_2\text{B}$ , (b)  $C2/m$ - $\text{Ir}_3\text{B}_2$ , (c)  $Fmm2$ - $\text{Ir}_4\text{B}_3$ , (d)  $P2_1/m$ - $\text{IrB}$ , (e)  $Cm$ - $\text{Ir}_4\text{B}_5$  and (f)  $Pnma$ - $\text{Ir}_3\text{B}_4$  at atmospheric pressure.
